# Supplementary material for: Cellular and Molecular Features of Developmentally Programmed Genome Rearrangement in a Vertebrate (Sea Lamprey: Petromyzon marinus)
Source: PubMed Central journal article supplement (PMC4920378; doi:10.1371/journal.pgen.1006103), 2016-06-24
Supplement: pgen.1006103.s012.pdf [file pgen.1006103.s012.pdf]

## S1 Table

***In situ* hybridization of the germline-specific marker *Germ1*.** Proportions of micronuclei showing *Germ1* hybridization during lamprey embryogenesis.

| Days post fertilization | Number of nuclei | Micronuclei |                | Proportion of <i>Germ1</i> + MNi (95% Bayesian central confidence interval) | Change in proportion of MNi with <i>Germ1</i> hybridization relative to previous time point |
|-------------------------|------------------|-------------|----------------|-----------------------------------------------------------------------------|---------------------------------------------------------------------------------------------|
|                         |                  | Total       | <i>Germ1</i> + |                                                                             |                                                                                             |
| 1                       | 21               | 4           | 4              | <b>1</b> (0.48-0.99)                                                        | -                                                                                           |
| 1.5                     | 139              | 150         | 133            | <b>0.887</b> (0.83-0.93)                                                    | -0.11                                                                                       |
| 2                       | 111              | 118         | 88             | <b>0.746</b> (0.66-0.82)                                                    | -0.14**                                                                                     |
| 2.5                     | 152              | 94          | 71             | <b>0.755</b> (0.66-0.83)                                                    | 0.01                                                                                        |
| 3                       | 155              | 55          | 48             | <b>0.873</b> (0.76-0.94)                                                    | 0.12                                                                                        |
| 5                       | 202              | 16          | 12             | <b>0.750</b> (0.50-0.90)                                                    | -0.12                                                                                       |
| 7                       | 200              | 0           | 0              | -                                                                           | -                                                                                           |

\*\* Pearson's  $\chi^2$   $p < 0.01$
