# Supplementary material for: Cellular and Molecular Features of Developmentally Programmed Genome Rearrangement in a Vertebrate (Sea Lamprey: Petromyzon marinus)
Source: PubMed Central journal article supplement (PMC4920378; doi:10.1371/journal.pgen.1006103), 2016-06-24
Supplement: pgen.1006103.s014.pdf [file pgen.1006103.s014.pdf]

### S3 Table

**Lagging chromatin in the context of early embryogenesis and PGR.** Proportions of cells in anaphase, with lagging anaphases and with micronuclei, over the first three days of lamprey development.

| Days post fertilization | Number of interphase cells | Number of anaphases | Number of lagging anaphases | Number of MN+ cells | Anaphases                                       |                      |                         |                      | Proportion of interphase cells with MNi |                      |
|-------------------------|----------------------------|---------------------|-----------------------------|---------------------|-------------------------------------------------|----------------------|-------------------------|----------------------|-----------------------------------------|----------------------|
|                         |                            |                     |                             |                     | Proportion of cells                             |                      | Proportion lagging      |                      | (95% CI)                                | Change from previous |
|                         |                            |                     |                             |                     | (95% Bayesian central confidence interval (CI)) | Change from previous | (95% CI)                | Change from previous |                                         |                      |
| 1                       | 98                         | 21                  | 12                          | 11                  | <b>0.18</b> (0.12-0.25)                         | -                    | <b>0.57</b> (0.36-0.76) | -                    | <b>0.11</b> (0.06-0.19)                 | -                    |
| 2                       | 137                        | 33                  | 30                          | 121                 | <b>0.19</b> (0.14-0.26)                         | 0.02                 | <b>0.91</b> (0.76-0.97) | 0.34**               | <b>0.88</b> (0.82-0.93)                 | 0.77**               |
| 2.5                     | 198                        | 24                  | 0                           | 56                  | <b>0.11</b> (0.07-0.16)                         | -0.09*               | <b>0.00</b> (0.00-0.14) | -0.91**              | <b>0.28</b> (0.22-0.35)                 | -0.60**              |
| 3                       | 225                        | 2                   | 0                           | 2                   | <b>0.01</b> (0.003-0.03)                        | -0.10**              | <b>0.00</b> (0.00-0.70) | -                    | <b>0.01</b> (0.003-0.03)                | -0.27**              |

\* Pearson's  $\chi^2$   $p < 0.05$ , \*\* Pearson's  $\chi^2$   $p < 0.01$
